# Supplementary material
Source: Springer Nature journal article supplement (https://www.springermedizin.de/resource/supplementary/12955_2014_1307_MOESM1_ESM.pdf/9559518)
Supplement: MOESM1 [file 9559518]

Table A1: Results of the systematic review

| Article                 | Measure (abbr.)                                    | Construct                            | Method                         | Type of DIF            | Disease group <sup>1</sup> : N                                                                 | Number of DIF-Items (%) | Magnitude | Impact on mean differences | Recommendation                                      | Status <sup>2</sup> |
|-------------------------|----------------------------------------------------|--------------------------------------|--------------------------------|------------------------|------------------------------------------------------------------------------------------------|-------------------------|-----------|----------------------------|-----------------------------------------------------|---------------------|
| Atkinson et al., 2011   | BPI                                                | Pain                                 | CFA                            | metric                 | HIV: 209<br>Cancer: 155<br>Total: 364                                                          | 0 (0%)                  | no        | n.n.                       | n.n.                                                | vq                  |
| Bode et al., 2003       | SF-36 PF                                           | Physical functioning                 | IRT (RRS)                      | uniform                | Cancer: 399<br>HIV: 170<br>Stroke: 328<br>Total: 897                                           | 5 of 10 (50%)           | no        | no                         | delete DIF-Items                                    | vs                  |
| C. C. Chen & Bode 2010  | MAM-36                                             | Manual Ability                       | IRT (Rasch)<br>multiple t-test | uniform                | Neuro: 129<br>Musco: 206<br>Total: 335                                                         | 14 of 36 (39%)          | yes       | no                         | no adjustments                                      | vq                  |
| Chien et al., 2009      | PFQ                                                | Patients opinions about their doctor | IRT (RRS)<br>d >0.5 logit      | uniform                | Internal: 109<br>Surgical: 97<br>Obst & Gyn.: 41<br>Pediatric: 23<br>Others: 129<br>Total: 399 | 9 of 23 (39%)           | yes       | no                         | delete DIF-Items                                    | vq                  |
| Coster et al., 2004     | Personal Care and Instrumental Activities Item Set | Daily activities                     | IRT (PCM)<br>multiple t-tests  | uniform                | Neuro: 159<br>Musco: 136<br>Med comp: 182<br>Total: 477                                        | 8 of 62 (13%)           | yes       | no                         | no adjustments                                      | ib                  |
| Dallmeijer et al., 2005 | SF-36 PF                                           | Physical functioning                 | IRT (PCM)<br>Residual Anova    | uniform<br>non-uniform | Stroke: 198<br>MS: 151<br>ALS: 194<br>Total: 543                                               | 7 of 10 (70%)           | yes       | relevant                   | adjustment with stroke;<br>no adjustment MS vs. ALS | vs                  |
| Dallmeijer et al., 2007 | FIM                                                | Physical functioning                 | IRT (RRS)<br>multiple t-tests  | uniform                | Stroke: 295<br>MS: 150<br>TBI: 88<br>Total: 533                                                | 13 of 18 (72%)          | yes       | yes:<br>small              | adjustment                                          | vs                  |

|                                       |                                                 |                         |                              |                               |                                                                                   |                                                                    |      |      |                        |    |
|---------------------------------------|-------------------------------------------------|-------------------------|------------------------------|-------------------------------|-----------------------------------------------------------------------------------|--------------------------------------------------------------------|------|------|------------------------|----|
| Farin & Fleitz, 2009                  | MOSES-Physician                                 | Mobility Self-care      | IRT (PCM) multiple t-test    | uniform                       | Musco: 549<br>Neuro: 258<br>Cardio: 212<br>Total: 1119                            | 28 of 47 (60%)                                                     | no   | no   | not combining          | dq |
| Given et al., 1992                    | CRA                                             | Caregiver Reactions     | CFA                          | metric;<br>factor covariances | Alzheimer: 101<br>Cancer: 276<br>Total: 377                                       | 0 (0%)                                                             | n.n. | n.n. | n.n.                   | dq |
| Haley et al., 2004                    | AM-PAC                                          | Daily activities        | IRT (RRS) multiple t-tests   | uniform                       | Neuro: 155<br>Musc: 138<br>Med comp: 184<br>Total: 476                            | 7 of 41 (17%)                                                      | yes  | no   | rewording;not deleting | dq |
| Hart, Mioduski & Stratford, 2005      | SCL-90-R: Items for depression and somatization | Depression Somatization | IRT (GRM) ordinal regression | uniform<br>non-uniform        | Ortho: 8834<br>Neuro: 328<br>Med: 186<br>Indust: 895<br>CPM: 655<br>Total: 10,898 | 1-2 of 17 [6-11%]                                                  | no   | no   | no adjustments         | vs |
| Lindeboom et al., 2004                | SIP                                             | Physical functioning    | IRT (extended Rasch)         | uniform                       | Stroke: 653<br>Internal: 854                                                      | 58 of 127 (46%)                                                    | yes  | no   | none                   | dq |
| Lundgren-Nilsson et al., 2006         | FIM – motor scale                               | Physical functioning    | IRT (PCM) Residual Anova     | uniform<br>non-uniform        | Stroke: 157<br>SCI: 157<br>TBI: 157<br>Total: 471                                 | including spinal: 11 of 13 (85%);<br>without spinal: 6 of 13 (46%) | no   | no   | adjustment             | vs |
| Moorer et al., 2001                   | RAND-36                                         | health status           | IRT (Mokken)                 | uniform                       | COPD: 148<br>MS:352<br>Rheuma: 223<br>Total: 723                                  | 4 of 36 (11%)                                                      | no   | no   | no adjustments         | vq |
| Pickard et al., 2006                  | CES-D                                           | Depression              | IRT (RRS) multiple t-tests   | uniform                       | Dep & Stroke: 32<br>Dep: 366<br>Total: 398                                        | 4 of 20 (20%)                                                      | yes  | no   | no adjustments         | vq |
| Prieto, Delgado, Perea & Ladera, 2011 | MMSE                                            | Dementia                | IRT (Rasch) multiple t-tests | uniform                       | PD: 119<br>Alzheimer: 110<br>Total: 321                                           | 6 of 30 (20%)                                                      | no   | no   | not comparing          | vq |

|                                          |                    |                          |                                                                |                                                  |                                                                  |                                             |       |                      |                                                  |    |
|------------------------------------------|--------------------|--------------------------|----------------------------------------------------------------|--------------------------------------------------|------------------------------------------------------------------|---------------------------------------------|-------|----------------------|--------------------------------------------------|----|
| Rao et al., 2009                         | SSCI               | Stigmatization           | Mantel-Haenszel & Liu-Agresti cumulative common log odds ratio | uniform                                          | Epilepsy: 165<br>Stroke: 190<br>Total: 355                       | 4 of 24 (17%)                               | yes   | no                   | no adjustments                                   | dq |
| Reilly, Bowden, Bardenhagen & Cook, 2006 | BDI                | Depression               | CFA                                                            | configural metric skalar strict                  | Epilepsy: 187<br>other Neuro: 150<br>Total: 337                  | 0 (0%)                                      | no    | n.n.                 | n.n.                                             | vq |
| Roelofs et al., 2007                     | TSK                | Kinesiophobia            | CFA                                                            | configural (factor loadings and residuals fixed) | Total: 2825<br>[allocation to comparison groups not fully clear] | 0 (0%)                                      | no    | no                   | no adjustments                                   | vq |
| Stultjens et al., 2012                   | WOMAC-PF           | physical functioning     | IRT (RRS) ordinal regression                                   | uniform non-uniform                              | OA: 288<br>PD: 191<br>LSP: 169<br>Total: 648                     | 4 of 17 (24%)                               | yes   | no                   | no adjustments                                   | vs |
| Taylor & McPherson 2007                  | SF-36 PF<br>HAQ-DI | Physical functioning     | IRT (RRS) multiple t-tests                                     | uniform                                          | RA: 142<br>PA: 134<br>Total: N=276                               | SF-36: 4 of 10 (40%)<br>HAQDI: 3 of 8 (38%) | yes   | no                   | SF-36 PF preferable                              | vs |
| van Groen et al., 2010                   | HAQ-DI             | Physical functioning     | IRT (gPCM) LM statistic                                        | uniform                                          | RA: 691<br>OA: 125<br>Gout: 102<br>Total: 818                    | 4 of 8 (50%)                                | yes   | yes: small not sign. | adjustments                                      | vs |
| Waller et al., 2005                      | BDI-II             | Depression               | Logistic regression                                            | uniform non-uniform                              | Breast Cancer: 267<br>Dep: 294<br>Total (woman): 561             | 15 of 21 (71%)                              | NCDIF | no                   | caution when interpreting breast cancer patients | vq |
| Wann-Hansson, et al. 2008                | NHPD               | illness-related distress | IRT (Rasch) Residual anova                                     | uniform non-uniform?                             | PD: 258<br>PAD: 215<br>Total: 473                                | 7 of 24 (29%)                               | no    | no                   | no adjustments                                   | vs |

|                                                   |                 |                               |                               |                                                      |                                                                                                                                   |                |     |                        |                                                                               |    |
|---------------------------------------------------|-----------------|-------------------------------|-------------------------------|------------------------------------------------------|-----------------------------------------------------------------------------------------------------------------------------------|----------------|-----|------------------------|-------------------------------------------------------------------------------|----|
| Weisscher, Glas, Vermeulen & De Haan, 2010        | ALDS            | daily activities              | IRT (2-PL)<br>LM statistic    | uniform                                              | Neuro: 497<br>Internal: 786<br>Total: 1283                                                                                        | 18 of 77 (23%) | yes | yes;<br>small<br>sign. | adjustment                                                                    | ib |
| Wirtz, Boecker, Forkmann & Neumann, 2011          | CARE            | Physicians<br>empathy         | IRT (RRS)<br>multiple t-Tests | uniform                                              | Cancer -<br>Bronchial: 28<br>Colorectal: 18<br>Prostate: 54<br>Oesophagal: 35<br>Breast: 109<br>Skin: 68<br>Other:7<br>Total: 309 | 5 of 10 (50%)  | yes | no                     | adjustment                                                                    | vq |
| Wong, Nordstokka, Gregorisch & Perez-Stable, 2009 | ChPSQ-9         | Satisfaction                  | CFA                           | metric;<br>factor covariances;<br>residual variances | Breast Cancer: 249<br>Lung Cancer: 334<br>Total: 583                                                                              | 1 of 9 (11%)   | no  | no                     | no adjustments                                                                | vq |
| Yao & Wu, 2005                                    | WHOQOL-<br>BREF | Quality of Life               | CFA                           | metric                                               | Pulmonary: 235<br>Hypertension: 487<br>Peptic ulcer: 487<br>Sinusitis: 376<br>Liver disease: 500<br>Total: 2726                   | 0 (0%)         | no  | n.n.                   | n.n.                                                                          | vq |
| Yorke, Horton, & Jones, 2012                      | Dyspnoea-12     | breathlessness<br>severity    | IRT (Rasch)<br>Residual anova | uniform<br>non-uniform                               | COPD: 123<br>Int lung disease: 129<br>CHF: 106<br>Total: 358                                                                      | 11 of 34 (32%) | no  | no                     | non-invariant<br>items deleted                                                | dq |
| Yu, Yu & Ahn, 2007                                | SF-36 PF,<br>MH | functioning;<br>Mental health | MIMIC                         | uniform                                              | Hypertension: 3156<br>Rheumatism:1654<br>Diabetes: 816<br>Res dis: 987<br>Dep: 864<br>Total: 8077                                 | 4 of 15 (27%)  | yes | no                     | caution when<br>comparing with<br>hypertension;<br>otherwise no<br>adjustment | vs |

Notes: n.n.: not necessary; <sup>1</sup>conditions abbreviations: Neuro: neurological disorders; musco: musculoskeletal disorders; obst.: obstetrics; gyn: gynaecological disorder; Med comp: medically complex; MS: Multiple sclerosis; ALS: amyotrophic lateral sclerosis; TBI: traumatic brain injury; Cardio: cardiovascular disorder; med: medical; indust: industrial; CPM: chronic pain management; Rheuma: rheumatism; dep: depression; PD: Parkinson's disease; OA: Osteoarthritis; LSP: Late-onset sequels of poliomyelitis; RA: rheumatoid arthritis; PAD: peripheral arterial disease; CHF: chronic heart failure; Res dis: respiratory disease; <sup>2</sup>status of questionnaire: vq: validated questionnaire; vs: validated scale; dq: questionnaire under development; ib: item bank;
